# Supplementary material
Source: PubMed Central journal article supplement (PMC3855210)
Supplement: NIHMS494391-supplement-01.pdf [file NIHMS494391-supplement-01.pdf]

**Supplemental Material:****Supplemental Figure 1. Combined genetic effects six SNPs on liver fat content.**

Comprehensive 6-SNP GRS tertile category (1-3) is shown along the x-axis and mean liver fat is plotted on the y-axis. The comprehensive GRS was based on tertiles of risk alleles (T1=0-3, n=22; T2= 4-6, n=143; and T3=7-9, n=44) and tested for an association with liver fat. Mean liver fat was not significantly increased as a function of comprehensive GRS ( $p_{\text{trend}}=0.08$ ).

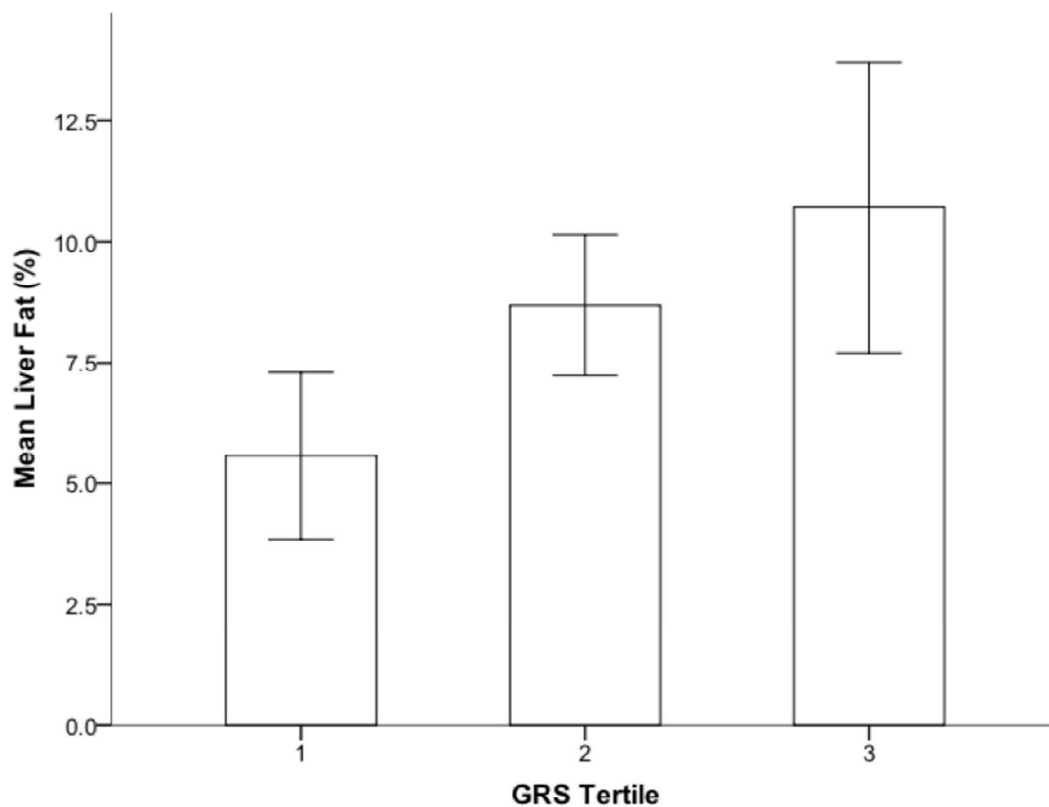

**Supplemental Table 1. Power calculation for six SNPs previously associated with liver fat content.**

| Gene           | SNP ID     | Effect <sub>Palmer</sub> | EAF <sub>Walker</sub> | n <sub>Required</sub> |
|----------------|------------|--------------------------|-----------------------|-----------------------|
| <i>PNPLA3</i>  | rs738409   | 0.28†                    | 0.52                  | 94                    |
| <i>PPP1R3B</i> | rs4240624  | 0.15†                    | 0.67                  | 392                   |
| <i>NCAN</i>    | rs2228603  | 0.27†                    | 0.03                  | 891                   |
| <i>GCKR</i>    | rs780094   | 0.10†                    | 0.32                  | 901                   |
| <i>LYPLAL1</i> | rs12137855 | 0.07†                    | 0.92                  | 5328                  |

Assuming 80% power, an  $\alpha$ -error of 0.05, and the observed allele frequencies in our Hispanic study population (EAF<sub>Walker</sub>), our sample size was sufficient to detect a significant association with *PNPLA3* utilizing regression coefficients from Palmer et al.<sup>1</sup> (†=Effect<sub>Palmer</sub>). However, there was insufficient power to detect association of liver fat content with the *GCKR*, *LYPLAL1*, *NCAN*, and *PPP1R3B* variants in our study population. EAF=effect allele frequency. Calculations performed in Quanto Ver 1.2.4.

References:

1. Palmer ND, Musani SK, Yerges-Armstrong LM, Feitosa MF, Bielak LF, Hernaez R et al. Characterization of European-ancestry NAFLD-associated Variants in individuals of African and Hispanic descent. *Hepatology*. 2013 Apr 8. doi: 10.1002/hep.26440. [Epub ahead of print]
